# Supplementary material for: Metallothionein 3 Promotes Osteoblast Differentiation in C2C12 Cells via Reduction of Oxidative Stress
Source: MDPI journal article supplement (doi:10.3390/ijms22094312), 2021-04-21
Supplement: s1 [file s1]

## Supplementary Materials

to

### Metallothionein 3 promotes osteoblast differentiation in C2C12 cells

via reduction of oxidative stress

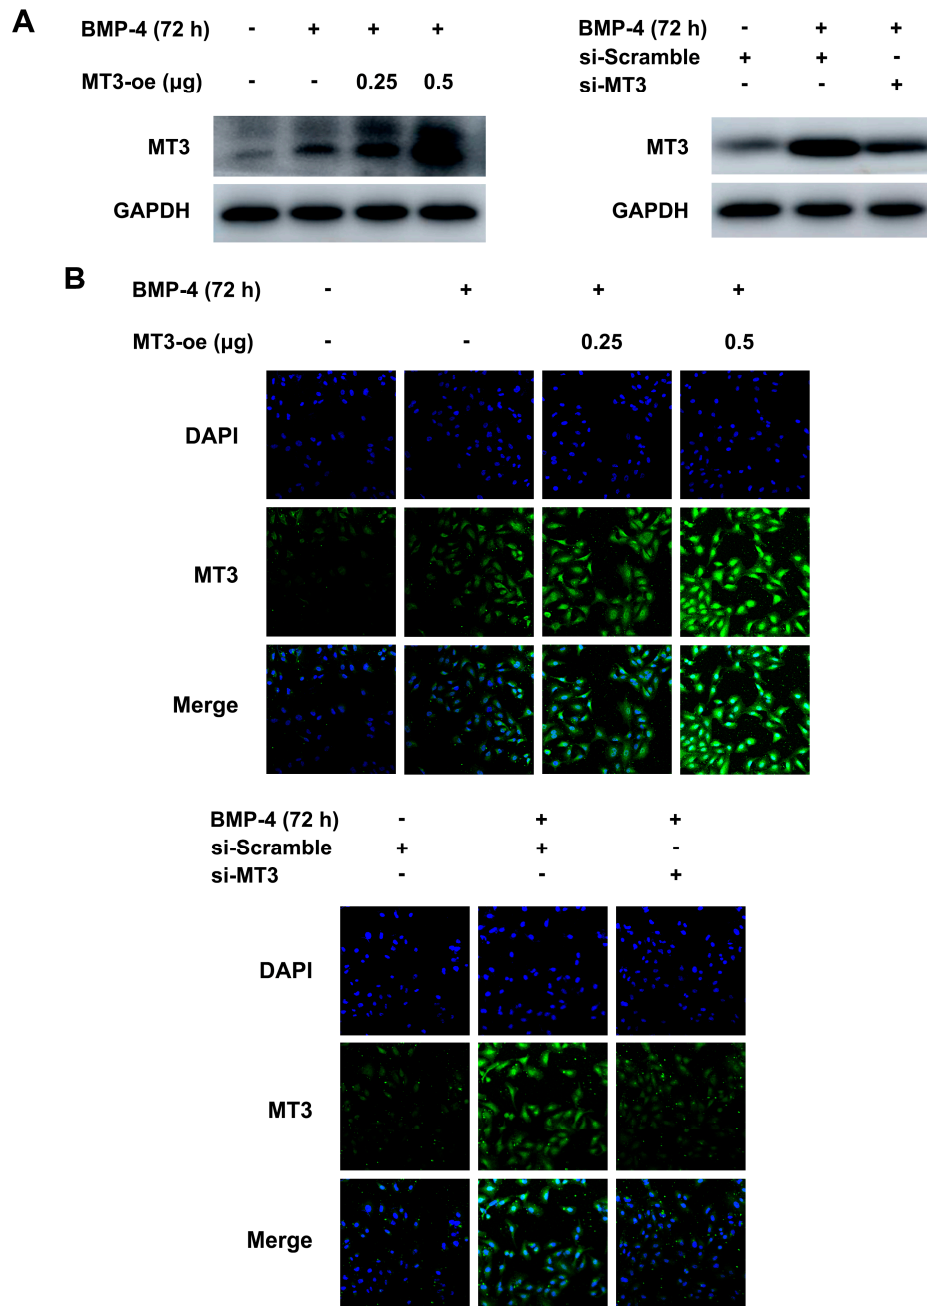

Supplementary Figure S1. Identification of the transfection efficiency of MT3-overexpressing plasmids and MT3 small interfering RNAs in C2C12 cells. (A)

Protein expression levels of MT3 and GAPDH after transfection of MT3-overexpressing plasmids or MT3 small interfering RNAs in C2C12 cells. (B) Immunofluorescence staining of MT3 after transfection of MT3-overexpressing plasmids or MT3 small interfering RNAs in C2C12 cells (magnification=200x).

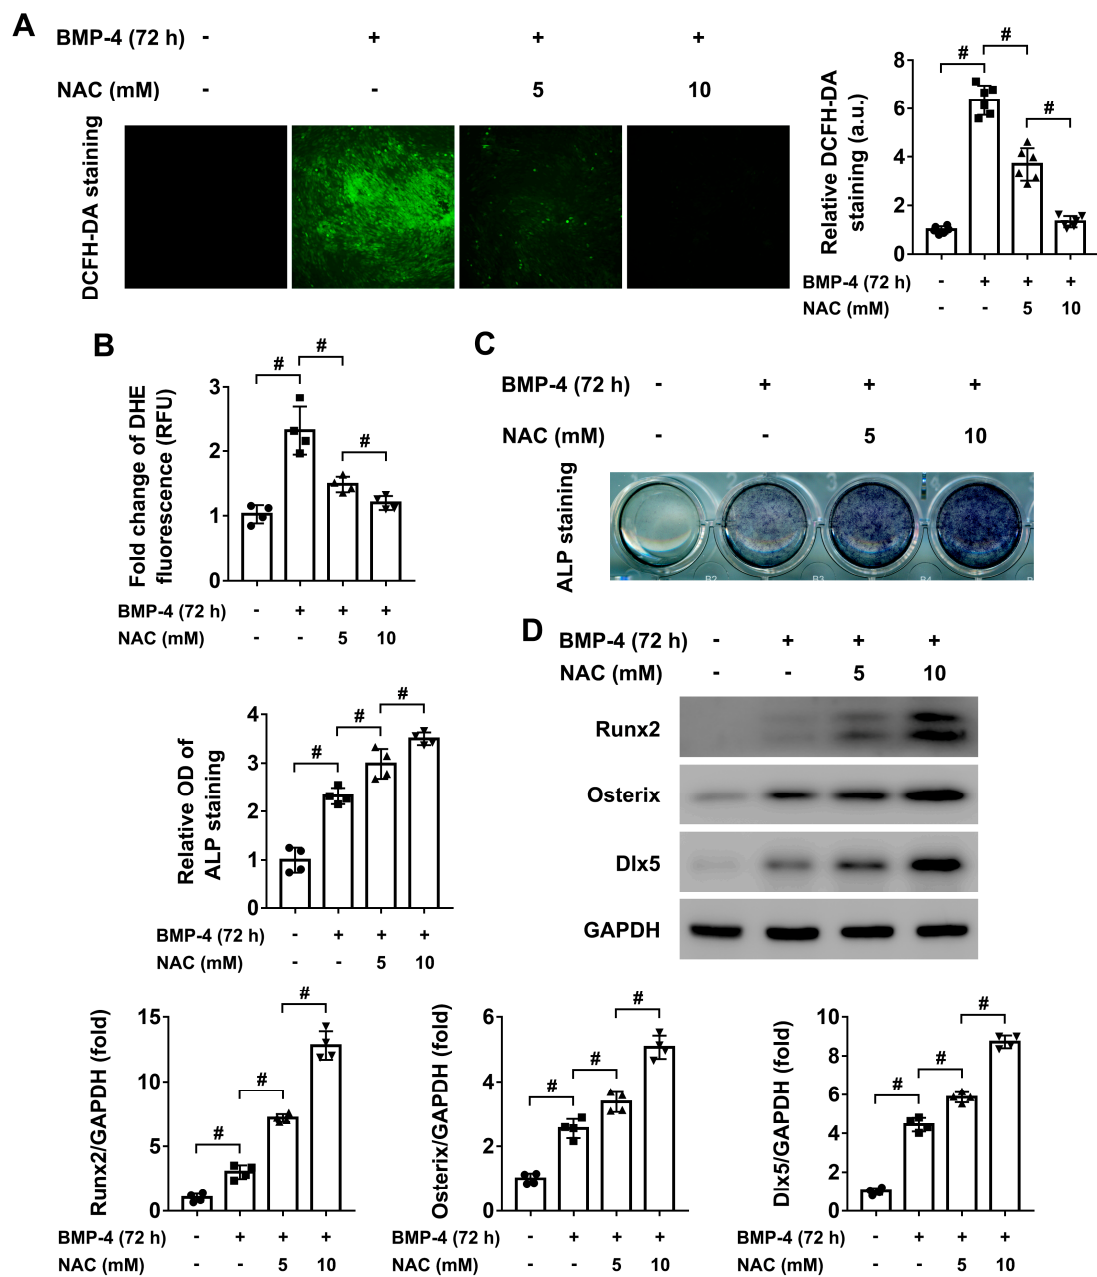

**Supplementary Figure S2. NAC treatment promotes BMP4-induced osteoblast differentiation in C2C12 cells.** (A) DCFH-DA staining and quantitative analysis of

ROS production in saline- or NAC-handled C2C12 cells treated with or without recombinant BMP4 for 72 hours (magnification=100x). (B) Quantitative analysis of DHE fluorescence in saline- or NAC-handled C2C12 cells treated with or without recombinant BMP4 for 72 hours. (C) ALP staining and quantitative analysis of ALP activity in saline- or NAC-handled C2C12 cells treated with or without recombinant BMP4 for 72 hours. (D) Protein expression levels and quantitative analysis of Runx2, Osterix, and Dlx5 in saline- or NAC-handled C2C12 cells treated with or without recombinant BMP4 for 72 hours. All data are presented as mean  $\pm$  SEM, # $P$ <0.05.

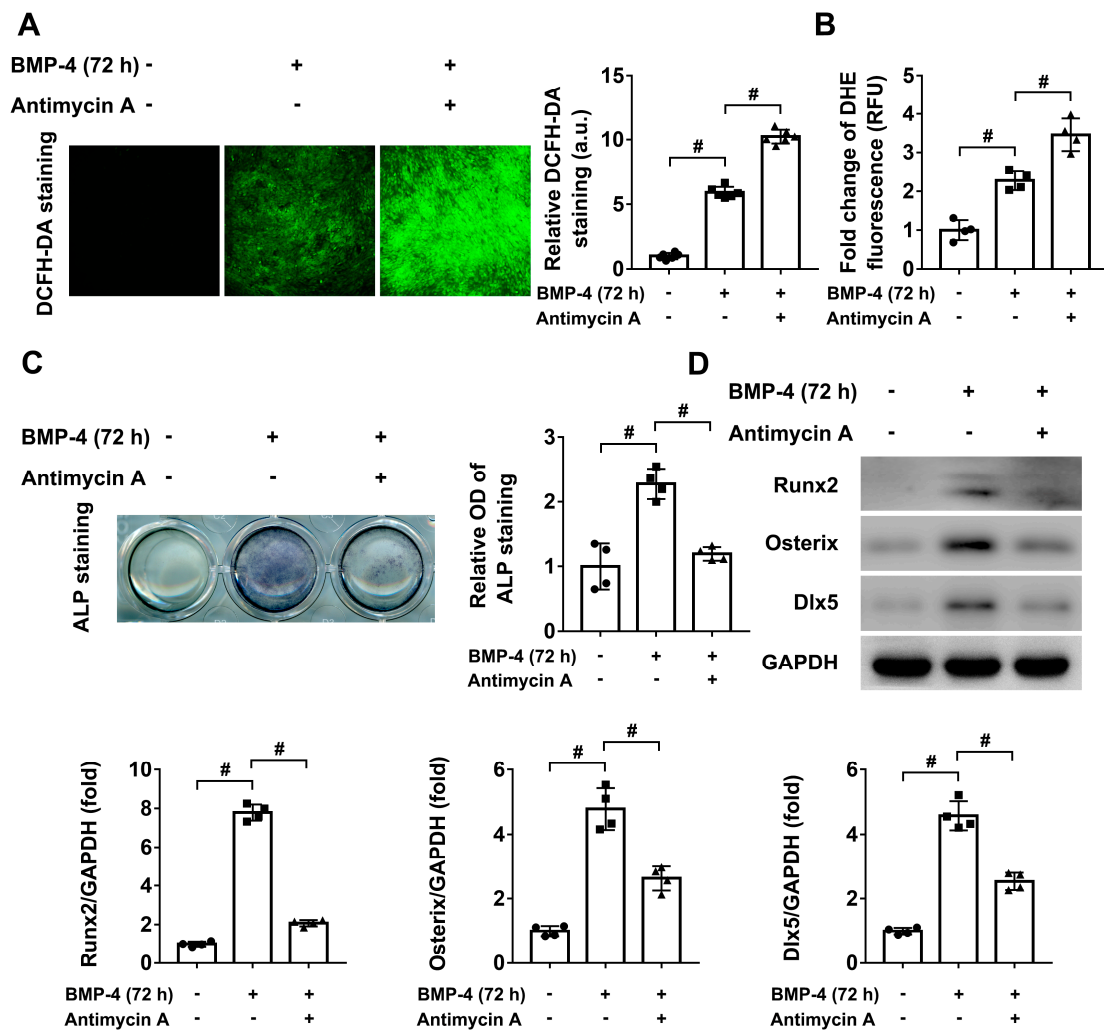

**Supplementary Figure S3. Antimycin A treatment inhibits BMP4-induced osteoblast differentiation in C2C12 cells.** (A) DCFH-DA staining and quantitative analysis of ROS production in saline- or antimycin A (0.5  $\mu$ M)-handled C2C12 cells treated with or without recombinant BMP4 for 72 hours (magnification=100x). (B) Quantitative analysis of DHE fluorescence in saline- or antimycin A (0.5  $\mu$ M)-handled C2C12 cells treated with or without recombinant BMP4 for 72 hours. (C) ALP staining and quantitative analysis of ALP activity in saline- or antimycin A (0.5  $\mu$ M)-handled C2C12 cells treated with or without recombinant BMP4 for 72 hours. (D) Protein expression levels and quantitative analysis of Runx2, Osterix, and Dlx5 in saline- or antimycin A (0.5  $\mu$ M)-handled C2C12 cells treated with or without recombinant BMP4 for 72 hours. All data are presented as mean  $\pm$  SEM, # $P$ <0.05.
